# Supplementary material for: The relationship between physical fitness and competitive performance of Taekwondo athletes
Source: PLoS One. 2022 Jun 24;17(6):e0267711. doi: 10.1371/journal.pone.0267711 (PMC9232157; doi:10.1371/journal.pone.0267711)
Supplement: S1 Data — (XLSX) [file pone.0267711.s002.xlsx]

## Sheet: Female 46kg
Athlete serial number	Weighted Squat Score (Phase 1)	Abdominal Muscle Endurance Score (Phase 1)	Back Muscle Endurance Score (Phase 1)	30-meter Run Score (Phase 1)	3000-meter Run Score (Phase 1)	Total Physical Fitness Test Score ( Phase 1)	Physical Fitness Test Ranking ( Phase 1)		Weighted Squat Score (Phase 2)	Abdominal Muscle Endurance Score (Phase 2)	Back Muscle Endurance Score (Phase 2)	30-meter Run Score (Phase 2)	3000-meter Run Score (Phase 2)	Total Physical Fitness Test Score ( Phase 2)	Physical Fitness Test Ranking ( Phase 2)		Average score of two physical fitness tests	Average ranking of two physical fitness tests		Competition ranking (1st leg)	Competition ranking (2nd leg)	Competition ranking (3rd leg)	Competition ranking (4th leg)	Point	Overall competition results
1	20	20	20	6	13	79	8		20	20	20	9	19	88	1		83.5	6		3				61.7	8
2	20	20	20	6	19	85	3		20	20	20	6	18	84	4		84.5	3			2	3		111.12	5
3	20	20	20	5	4	69	21		20	20	20	8	5	73	17		71	19
4	20	20	20	7	3	70	18		20	20	20	5	3	68	19		69	22			5
5	20	20	20	7	4	71	16										71	20
6	20	20	20	7	19	86	2		20	20	20	5	19	84	5		85	2		1		3		151.12	1
7	20	20	20	5	17	82	6		20	20	20	5	17	82	9		82	7		2		5	2	96.72	6
8	20	20	20	9	3	72	15		20	20	20	11	7	78	12		75	13				5	3
9	9	20	20	0	1	50	25		14	20	20	0	3	57	20		53.5	23
10	20	20	20	10	9	79	7		20	20	20	9	7	76	16		77.5	12			3
11	19	4	20	2	6	51	24										51	25
12	18	20	20	3	13	74	12		20	20	20	7	14	81	10		77.5	11
13	20	20	20	9	13	82	5		20	20	20	10	15	85	3		83.5	5		3	3	2		132	4
14	18	20	20	4	8	70	19		20	20	20	6	7	73	18		71.5	18					5
15	17	20	20	4	8	69	20		20	20	20	8	9	77	14		73	16		5
16	20	20	20	9	7	76	10		20	20	20	7	16	83	8		79.5	9					3
17	20	20	20	8	16	84	4		20	20	20	8	16	84	6		84	4					5
18	20	20	20	4	9	73	14		17	20	20	7	13	77	15		75	14
19	18	20	20	7	9	74	13										74	15
20	20	9	20	9	8	66	22		20	20	20	11	6	77	13		71.5	17		5	5		5
21	18	20	20	6	12	76	11		20	20	20	8	12	80	11		78	10		5	5	5	5	64.8	7
22	20	20	20	4	6	70	17										70	21
23	20	20	20	9	20	89	1		20	20	20	4	20	84	7		86.5	1			1	5		136.72	3
24	20	20	20	7	10	77	9		20	20	20	10	16	86	2		81.5	8		5	5	1	1	143.2	2
25	13	6	20	7	6	52	23										52	24

## Sheet: Female 49kg
Athlete serial number	Weighted Squat Score (Phase 1)	Abdominal Muscle Endurance Score (Phase 1)	Back Muscle Endurance Score (Phase 1)	30-meter Run Score (Phase 1)	3000-meter Run Score (Phase 1)	Total Physical Fitness Test Score ( Phase 1)	Physical Fitness Test Ranking ( Phase 1)		Weighted Squat Score (Phase 2)	Abdominal Muscle Endurance Score (Phase 2)	Back Muscle Endurance Score (Phase 2)	30-meter Run Score (Phase 2)	3000-meter Run Score (Phase 2)	Total Physical Fitness Test Score ( Phase 2)	Physical Fitness Test Ranking ( Phase 2)		Average score of two physical fitness tests	Average ranking of two physical fitness tests		Competition ranking (1st leg)	Competition ranking (2nd leg)	Competition ranking (3rd leg)	Competition ranking (4th leg)	Point	Overall competition results
1	20	20	20	3	2	65	22										65	29
2	17	20	20	3	5	65	25		20	20	20	4	4	68	22		66.5	25		5
3	18	20	20	5	2	65	24		20	20	20	5	1	66	25		65.5	27
4	20	11	20	3	2	56	29		20	20	20	3	0	63	27		59.5	35
5									20	20	20	8	0	68	20		68	22
6	20	20	20	2	6	68	18		20	20	20	3	5	68	21		68	23
7									20	20	20	6	8	74	12		74	13
8	20	20	20	3	12	75	10		20	20	20	4	15	79	9		77	10			5	5	5
9	20	20	20	8	15	83	3		20	20	20	7	17	84	3		83.5	4		2	1	1	2	260	1
10	20	20	20	0	3	63	26										63	30
11	20	20	20	4	2	66	20										66	26
12	20	20	20	3	16	79	6		20	20	20	6	15	81	8		80	7
13	20	20	20	7	17	84	2		20	20	20	7	18	85	2		84.5	3
14	20	8	20	3	3	54	30		20	20	20	3	2	65	26		59.5	34
15	20	20	20	9	12	81	5		20	20	20	12	9	81	7		81	6				3		66.24	5
16	9	20	20	2	6	57	28		20	20	20	1	6	67	24		62	32				5
17	20	20	20	9	17	86	1		20	20	20	7	17	84	4		85	2		1	3			151.12	2
18	20	20	20	9	6	75	9										75	12
19	19	20	20	0	6	65	23		20	20	20	1	8	69	19		67	24
20	20	20	20	5	3	68	17		20	20	20	4	5	69	17		68.5	20		5			5
21	9	20	20	3	6	58	27		20	20	20	2	5	67	23		62.5	31		5		5	1
22	20	20	20	3	10	73	11										73	14
23	20	20	20	5	8	73	13		20	20	20	11	8	79	10		76	11		3			5	61.7	6
24									20	20	20	4	5	69	18		69	19
25	20	20	20	5	6	71	14		20	20	20	4	8	72	14		71.5	16			5		5
26									20	20	20	10	13	83	5		83	5				2		60	8
27	20	20	20	3	7	70	15		20	20	20	6	6	72	13		71	17
28	20	20	20	6	11	77	8		20	20	20	6	16	82	6		79.5	8			2	3	3	106.58	3
29	20	20	20	8	14	82	4		20	20	20	11	17	88	1		85	1			3			61.7	6
30	17	20	20	6	6	69	16		20	20	20	4	7	71	15		70	18			5
31									20	20	20	1	0	61	28		61	33
32	20	20	20	1	6	67	19		20	20	20	2	7	69	16		68	21
33	20	20	20	11	6	77	7		20	20	20	12	6	78	11		77.5	9		3	5	5	3	79.2	4
34	20	20	20	3	2	65	21										65	28
35	20	20	20	5	8	73	12										73	15
National team athlete	20	20	20	17	12	89

## Sheet: Female 53kg
Athlete serial number	Weighted Squat Score (Phase 1)	Abdominal Muscle Endurance Score (Phase 1)	Back Muscle Endurance Score (Phase 1)	30-meter Run Score (Phase 1)	3000-meter Run Score (Phase 1)	Total Physical Fitness Test Score ( Phase 1)	Physical Fitness Test Ranking ( Phase 1)		Weighted Squat Score (Phase 2)	Abdominal Muscle Endurance Score (Phase 2)	Back Muscle Endurance Score (Phase 2)	30-meter Run Score (Phase 2)	3000-meter Run Score (Phase 2)	Total Physical Fitness Test Score ( Phase 2)	Physical Fitness Test Ranking ( Phase 2)		Average score of two physical fitness tests	Average ranking of two physical fitness tests		Competition ranking (1st leg)	Competition ranking (2nd leg)	Competition ranking (3rd leg)	Competition ranking (4th leg)	Point	Overall competition results
1	20	20	20	3	17	80	5		20	20	20	5	17	82	5		81	1			2	3		106.58	3
2	20	20	20	4	0	64	28										64	2
3	20	20	20	4	9	73	12		20	20	20	5	10	75	12		74	5			3
4	20	20	20	9	11	80	4		20	20	20	10	9	79	8		79.5	4
5	20	20	20	5	2	67	20		20	20	20	1	4	65	28		66	3
6	20	20	20	4	3	67	22		20	20	20	4	2	66	26		66.5	6			5		5
7	10	20	20	3	6	59	32		20	20	20	1	8	69	22		64	7					5
8	19	20	20	4	8	71	14		20	20	20	4	9	73	19		72	8
9									20	20	20	6	9	75	16		75	9				5
10									20	20	20	2	4	66	27		66	10
11	20	20	20	5	2	67	18										67	13
12	20	20	20	6	2	68	16		20	20	20	7	9	76	10		72	11
13	20	20	20	3	4	67	19		20	20	20	2	3	65	29		66	12
14	19	20	20	5	14	78	6		20	20	20	4	19	83	4		80.5	15
15									20	20	20	1	1	62	32		62	16
16	13	20	20	4	4	61	31		20	20	20	5	6	71	21		66	14					3
17	19	20	20	3	4	66	26										66	18
18									20	20	20	4	18	82	7		82	17				2		60	5
19	20	20	20	3	7	70	15		20	20	20	7	6	73	18		71.5	20		5	5		2	53.78	7
20	20	20	20	8	8	76	7		20	20	20	7	7	74	17		75	19
21	20	20	20	9	4	73	11		20	20	20	10	5	75	13		74	21
22	20	20	20	3	5	68	17										68	22
23	20	20	20	9	7	76	8										76	24
24	20	20	20	5	1	66	25		20	20	20	5	4	69	23		67.5	25		5		5	5	58.32	6
25	20	20	20	2	0	62	29		20	20	20	3		63	31		62.5	23		5			5	51.84	8
26									20	20	20	6	9	75	15		75	26
27	20	20	20	9	15	84	2		20	20	20	10	17	87	1		85.5	27		3	3		1	87.12	4
28									20	20	20	1		61	33		61	28
29	18	20	20	3	5	66	27										66	29
30	12	20	20	9	6	67	24		20	20	20	10	6	76	11		71.5	30		5	5
31									20	20	20	4	18	82	5		82	33
32	16	20	20	4	7	67	23		20	20	20	4	7	71	20		69	34				5
33	17	4	20	10	7	58	33		20	20	20	8	7	75	14		66.5	35
34	20	20	20	7	0	67	21										67	32
35									20	20	20	3	5	68	24		68	36
36	20	20	20	3	8	71	13										71	31		3
37	20	20	20	9	11	80	3		20	20	20	7	17	84	2		82	37
38									20	20	20	3	5	68	25		68	38
39	14	20	20	5	2	61	30		17	20	20	5	2	64	30		62.5	40			5	5
40	20	20	20	8	6	74	10										74	39
41	20	20	20	7	8	75	9		20	20	20	8	9	77	9		76	41		1		3		146.58	2
42	20	20	20	8	18	86	1		20	20	20	6	18	84	3		85	42		2	1	1	3	260	1

## Sheet: Female 57kg
Athlete serial number	Weighted Squat Score (Phase 1)	Abdominal Muscle Endurance Score (Phase 1)	Back Muscle Endurance Score (Phase 1)	30-meter Run Score (Phase 1)	3000-meter Run Score (Phase 1)	Total Physical Fitness Test Score ( Phase 1)	Physical Fitness Test Ranking ( Phase 1)		Weighted Squat Score (Phase 2)	Abdominal Muscle Endurance Score (Phase 2)	Back Muscle Endurance Score (Phase 2)	30-meter Run Score (Phase 2)	3000-meter Run Score (Phase 2)	Total Physical Fitness Test Score ( Phase 2)	Physical Fitness Test Ranking ( Phase 2)		Average score of two physical fitness tests	Average ranking of two physical fitness tests		Competition ranking (1st leg)	Competition ranking (2nd leg)	Competition ranking (3rd leg)	Competition ranking (4th leg)	Point	Overall competition results
1	20	20	20	13	11	84	3		20	20	20	8	11	79	8		81.5	7
2	20	20	20	8	15	83	4		20	20	20	7	17	84	3		83.5	3			3			57.16	8
3	15	12	20	4	2	53	40		19	20	20	3	1	63	29		58	39
4	19	20	20	7	15	81	10		16	20	20	1	14	71	19		76	15
5	20	20	20	4	15	79	11		20	20	20	4	15	79	9		79	10
6	20	20	20	5	17	82	7		20	20	20	7	16	83	4		82.5	6				3	5
7	20	20	20	4	5	69	27		20	20	20	3	1	64	27		66.5	31
8	20	20	20	8	8	76	15										76	13
9	20	20	20	3	0	63	32										63	33
10	20	20	20	0	0	60	34		20	20	20	2	0	62	30		61	35
11	20	12	20	11	6	69	29		20	20	20	12	6	78	10		73.5	20		5
12	20	20	20	7	9	76	16		20	20	20	7	9	76	14		76	14		2		5		92.18	5
13	20	20	20	1	9	70	22		20	20	20	1	8	69	21		69.5	26
14	8	20	20	4	0	52	42		11	20	20	1	0	52	32		52	42		5
15	20	20	20	2	8	70	23		20	20	20	1	8	69	23		69.5	28				5
16	15	20	20	6	14	75	19		20	20	20	2	16	78	11		76.5	12
17	20	20	20	3	18	81	9		20	20	20	0	9	69	12		75	18		3	1	5	2	157.6	2
18	20	20	20	2	7	69	28		20	20	20	5	5	70	22		69.5	27
19	20	20	20	4	6	70	26										70	24		5	5		5	58.32	7
20	15	20	20	0	4	59	38										59	38
21	16	20	20	2	2	60	35										60	36
22	12	20	20	1	7	60	36		16	20	20	1	9	66	25		63	32
23	20	20	20	6	8	74	20		20	20	20	5	8	73	16		73.5	21			5
24	11	20	20	1	0	52	41		16	20	20	0	0	56	31		54	41
25	20	20	20	5	10	75	18		20	20	20	1	12	73	17		74	19
26	20	20	20	6	9	75	17		20	20	20	3	13	76	13		75.5	17			5
27	20	20	20	5	18	83	5										83	4
28	20	20	20	7	6	73	21		20	20	20	8	2	70	20		71.5	22
29	20	20	20	10	13	83	6		20	20	20	8	14	82	7		82.5	5				3	5	58.53	6
30	20	14	20	3	9	66	31		19	20	20	1	9	69	24		67.5	29
31	20	20	20	12	17	89	2		20	20	20	12	16	88	1		88.5	1		3	3	1	1	172	1
32	20	8	20	5	4	57	39										57	40
33	20	20	20	4	6	70	25										70	25
34	20	12	20	13	4	77	14		20	20	20	11	4	75	15		76	16		1	5	5	3	143.2	3
35	20	20	20	5	13	78	13										78	11
36	20	20	20	11	19	90	1		20	20	20	9	16	85	2		87.5	2
37	15	20	20	2	5	62	33		20	20	20	0	4	64	28		63	34		5			5
38	20	20	20	10	11	81	8		20	20	20	7	15	82	5		81.5	8			2	2	3	130.58	4
39	19	20	20	5	4	68	30		20	20	20	1	4	65	26		66.5	30
40	20	20	20	5	13	78	12		20	20	20	5	17	82	6		80	9
41	12	20	20	6	2	60	37										60	37
42	20	20	20	3	7	70	24		20	20	20	5	6	71	18		70.5	23
National team athlete	20	20	20	7	17	84

## Sheet: Female 62kg
Athlete serial number	Weighted Squat Score (Phase 1)	Abdominal Muscle Endurance Score (Phase 1)	Back Muscle Endurance Score (Phase 1)	30-meter Run Score (Phase 1)	3000-meter Run Score (Phase 1)	Total Physical Fitness Test Score ( Phase 1)	Physical Fitness Test Ranking ( Phase 1)		Weighted Squat Score (Phase 2)	Abdominal Muscle Endurance Score (Phase 2)	Back Muscle Endurance Score (Phase 2)	30-meter Run Score (Phase 2)	3000-meter Run Score (Phase 2)	Total Physical Fitness Test Score ( Phase 2)	Physical Fitness Test Ranking ( Phase 2)		Average score of two physical fitness tests	Average ranking of two physical fitness tests		Competition ranking (1st leg)	Competition ranking (2nd leg)	Competition ranking (3rd leg)	Competition ranking (4th leg)	Point	Overall competition results
1	15	20	20	4	3	62	25		20	20	20	6	4	70	17		66	24
2	20	20	20	10	16	86	2		20	20	20	7	18	85	2		85.5	2		1	1	1	1	300	1
3	20	20	20	8	9	77	5		20	20	20	10	9	79	5		78	5		3	3	5	3
4	20	20	20	8	12	80	4		20	20	20	14	6	80	4		80	4		3		3	3	93.6	4
5	20	20	20	10	6	76	7		20	20	20	7	7	74	12		75	9
6	20	20	20	9	3	72	13		20	20	20	11	5	76	10		74	11					5
7									20	20	20	1	0	61	26		61	27
8	15	20	20	0	5	60	28		20	20	20	0	0	60	28		60	30
9	20	20	20	8	4	72	11		20	20	20	11	6	77	8		74.5	10		5	5	5	2	64.8	5
10	11	20	20	1	0	52	30										52	32
11	20	20	20	5	9	74	8		20	20	20	8	9	77	7		75.5	7		5		5		58.32	6
12									16	20	20	3	13	72	15		72	14
13	20	20	20	8	0	68	20										68	21
14	20	20	20	4	0	64	24		20	20	20	2	0	62	25		63	26
15	20	20	20	1	8	69	19		20	20	20	1	4	65	22		67	22				5	5	51.84	8
16	20	20	20	4	9	73	10										73	13
17	15	20	20	0	0	55	29		20	20	20	0	4	64	23		59.5	31
18	20	20	20	0	0	60	27		20	20	20	0	0	60	27		60	29			5
19	20	20	20	5	6	71	16		20	20	20	6	6	72	13		71.5	15
20	20	20	20	12	17	89	1		20	20	20	10	20	90	1		89.5	1			2	2		130.58	3
21	20	20	20	8	8	76	6		20	20	20	9	7	76	9		76	6
22	20	20	20	8	0	68	21		20	20	20	11	0	71	16		69.5	18			5		5	51.84	8
23	20	20	20	8	4	72	14		20	20	20	6	3	69	19		70.5	17		5
24	20	20	20	3	2	65	23		20	20	20	6	3	69	18		67	23
25	20	20	20	7	5	72	12		20	20	20	10	6	76	11		74	12		5	5		5	53.78	7
26	20	20	20	10	3	73	9		20	20	20	14	4	78	6		75.5	8
27	20	20	20	0	0	60	26										60	28
28	20	20	20	1	5	66	22		20	20	20	2	2	64	24		65	25
29	20	20	20	2	9	71	17		20	20	20	6	6	72	14		71.5	16
30	20	20	20	5	16	81	3		20	20	20	8	16	84	3		82.5	3		2	3	3		132	2
31	20	20	20	4	6	70	18		20	20	20	2	5	67	20		68.5	19
32	20	7	20	4	0	51	31										51	33
33	20	20	20	9	2	71	15		20	20	20	3	3	66	21		68.5	20

## Sheet: Female 67kg
Athlete serial number	Weighted Squat Score (Phase 1)	Abdominal Muscle Endurance Score (Phase 1)	Back Muscle Endurance Score (Phase 1)	30-meter Run Score (Phase 1)	3000-meter Run Score (Phase 1)	Total Physical Fitness Test Score ( Phase 1)	Physical Fitness Test Ranking ( Phase 1)		Weighted Squat Score (Phase 2)	Abdominal Muscle Endurance Score (Phase 2)	Back Muscle Endurance Score (Phase 2)	30-meter Run Score (Phase 2)	3000-meter Run Score (Phase 2)	Total Physical Fitness Test Score ( Phase 2)	Physical Fitness Test Ranking ( Phase 2)		Average score of two physical fitness tests	Average ranking of two physical fitness tests		Competition ranking (1st leg)	Competition ranking (2nd leg)	Competition ranking (3rd leg)	Competition ranking (4th leg)	Point	Overall competition results
1									20	20	20	4	3	67	16		67	13
2	20	20	20	0	6	66	14										66	16
3	20	20	20	10	19	89	1		20	20	20	9	20	89	1		89	1
4	20	20	20	4	2	66	13		20	20	20	4	2	66	18		66	15				5	5	51.84	8
5	20	20	20	6	7	73	6		20	20	20	6	12	78	3		75.5	4		2	1	1	2	260	1
6	20	20	20	8	5	73	7		20	20	20	11	6	77	4		75	5			3	3	3	87.12	5
7	20	20	20	6	5	71	10		20	20	20	7	4	71	10		71	10
8									12	20	20	0	0	52	24		52	25
9	14	20	20	6	1	61	17		20	20	20	6	3	69	15		65	18		5
10	12	20	20	5	0	57	19		20	20	20	5	0	65	20		61	21
11	20	20	20	7	8	75	3		20	20	20	6	11	77	5		76	3		3		2	5	111.12	3
12	17	5	20	7	6	55	20		20	20	20	5	6	71	11		63	19			5
13									20	20	20	3	7	70	13		70	12
14	20	20	20	10	13	83	2		20	20	20	7	13	80	2		81.5	2			2	3	5	111.12	3
15									16	20	20	1	0	57	23		57	24
16	15	20	20	10	4	69	11		20	20	20	8	5	73	9		71	9		5		5	1	58.32	6
17	19	20	20	0	2	61	16										61	20
18	20	20	20	10	2	72	8		20	20	20	11	2	73	8		72.5	8		5				51.84	8
19	11	20	20	0	7	58	18		15	20	20	0	7	62	22		60	22			5		3
20	20	20	20	3	0	63	15		20	20	20	7	0	67	17		65	17			5
21	20	20	20	3	8	71	9		20	20	20	1	9	70	12		70.5	11			5
22	20	20	20	3	11	74	5		20	20	20	3	12	75	6		74.5	6		3				57.16	7
23	20	20	20	5	10	75	4		20	20	20	5	9	74	7		74.5	7		1	3	5	5	157.6	2
24	18	9	20	1	4	52	22										52	26
25	11	20	20	4	0	55	21		20	20	20	3	1	64	21		59.5	23
26	20	20	20	4	4	68	12		20	20	20	0	5	65	19		66.5	14		5
National team athlete	20	20	20	3	7	70

## Sheet: Female 73kg
Athlete serial number	Weighted Squat Score (Phase 1)	Abdominal Muscle Endurance Score (Phase 1)	Back Muscle Endurance Score (Phase 1)	30-meter Run Score (Phase 1)	3000-meter Run Score (Phase 1)	Total Physical Fitness Test Score ( Phase 1)	Physical Fitness Test Ranking ( Phase 1)		Weighted Squat Score (Phase 2)	Abdominal Muscle Endurance Score (Phase 2)	Back Muscle Endurance Score (Phase 2)	30-meter Run Score (Phase 2)	3000-meter Run Score (Phase 2)	Total Physical Fitness Test Score ( Phase 2)	Physical Fitness Test Ranking ( Phase 2)		Average score of two physical fitness tests	Average ranking of two physical fitness tests		Competition ranking (1st leg)	Competition ranking (2nd leg)	Competition ranking (3rd leg)	Competition ranking (4th leg)	Point	Overall competition results
1									20	20	20	3	8	71	5		71	4				3
2	12	20	20	0	5	57	15		16	20	20	0	8	64	14		60.5	16				5
3	20	20	20	6	3	69	5		20	20	20	7	3	70	7		69.5	5			3	5	1	72.72	4
4									11	20	20	1	0	52	21		52	24
5	20	20	20	1	3	64	11		16	20	20	0	0	56	20		60	18			5
6	12	20	20	3	6	61	13		20	20	20	5	6	71	4		66	9					5
7	20	20	20	7	9	76	2		20	20	20	6	8	74	1		75	2		2	2	2		180	2
8	19	9	20	4	3	55	18		20	20	20	6	4	70	6		62.5	13		5			5
9	15	20	20	0	1	56	16										56	22
10	20	20	20	11	12	83	1		20	20	20	7	7	74	2		78.5	1		1	1	3	3	236	1
11	20	20	20	0	0	60	14		20	20	20	0	0	60	17		60	17		5				51.84	7
12	17	20	20	5	10	72	3		20	20	20	4	8	72	3		72	3		3		1	2	151.12	3
13	20	20	20	0	7	67	7		20	20	20	2	7	69	8		68	8			5
14									20	20	20	0	0	60	18		60	19
15	15	20	20	1	5	61	12		20	20	20	3	5	68	9		64.5	12				5
16	18	20	20	5	2	65	10		20	20	20	0	0	60	19		62.5	14				5		51.84	7
17	19	20	20	0	6	65	9		20	20	20	0	5	65	13		65	11
18	8	20	20	3	0	51	20		20	20	20	6	0	66	11		58.5	20		5	5			58.32	6
19									20	20	20	1	0	61	16		61	15
20	14	20	20	0	1	55	17										55	23
21	8	20	20	4	0	52	19		20	20	20	2	0	62	15		57	21			5			51.84	7
22	20	20	20	0	9	69	6		20	20	20	0	8	68	10		68.5	7					5
23	20	20	20	0	6	66	8		20	20	20	0	5	65	12		65.5	10		5			5
24	20	20	20	9	0	69	4										69	6		3	3	5	3	72	5

## Sheet: Female +73kg
Athlete serial number	Weighted Squat Score (Phase 1)	Abdominal Muscle Endurance Score (Phase 1)	Back Muscle Endurance Score (Phase 1)	30-meter Run Score (Phase 1)	3000-meter Run Score (Phase 1)	Total Physical Fitness Test Score ( Phase 1)	Physical Fitness Test Ranking ( Phase 1)		Weighted Squat Score (Phase 2)	Abdominal Muscle Endurance Score (Phase 2)	Back Muscle Endurance Score (Phase 2)	30-meter Run Score (Phase 2)	3000-meter Run Score (Phase 2)	Total Physical Fitness Test Score ( Phase 2)	Physical Fitness Test Ranking ( Phase 2)		Average score of two physical fitness tests	Average ranking of two physical fitness tests		Competition ranking (1st leg)	Competition ranking (2nd leg)	Competition ranking (3rd leg)	Competition ranking (4th leg)	Point	Overall competition results
1	20	20	20	4	3	67	4		20	20	20	6	2	68	4		67.5	5		3	2	3		132	3
2	10	20	20	4	2	56	14		10	20	20	3	0	53	16		54.5	16		5
3	10	20	20	6	8	64	6		20	20	20	4	8	72	2		68	4		1	5	3	1	157.6	2
4	15	20	20	6	2	63	8		20	20	20	5	0	65	10		64	8
5	13	20	20	4	0	57	12		20	20	20	4	0	64	11		60.5	11				5
6	20	20	20	4	8	72	1		20	20	20	5	6	71	3		71.5	2				2	3	90.24	4
7	13	20	20	0	2	55	15		15	20	20	0	2	57	15		56	15
8	18	20	20	5	4	67	5		20	20	20	2	3	65	9		66	6			3	5		57.6	8
9	20	20	20	7	4	71	2		20	20	20	9	6	75	1		73	1		3	3		5	87.12	5
10	9	20	20	1	4	54	16		12	20	20	5	3	60	14		57	14		5		5	5	58.32	7
11	20	20	20	4	6	70	3		20	20	20	4	4	68	5		69	3		2	1	1	2	260	1
12	16	20	20	0	0	56	13		20	20	20	0	0	60	12		58	13			5		3
13	19	20	20	3	1	63	7		20	20	20	5	3	68	6		65.5	7		5	5	5	5	64.8	6
14	15	20	20	2	4	61	10		20	20	20	1	6	67	7		64	9			5
15	20	20	20	0	1	61	9		20	20	20	2	3	65	8		63	10					5
16	20	20	20	0	0	60	11		20	20	20	0	0	60	13		60	12		5
National team athlete	20	20	20	3	3	66

## Sheet: Male 54kg
Athlete serial number	Weighted Squat Score (Phase 1)	Abdominal Muscle Endurance Score (Phase 1)	Back Muscle Endurance Score (Phase 1)	30-meter Run Score (Phase 1)	3000-meter Run Score (Phase 1)	Total Physical Fitness Test Score ( Phase 1)	Physical Fitness Test Ranking ( Phase 1)		Weighted Squat Score (Phase 2)	Abdominal Muscle Endurance Score (Phase 2)	Back Muscle Endurance Score (Phase 2)	30-meter Run Score (Phase 2)	3000-meter Run Score (Phase 2)	Total Physical Fitness Test Score ( Phase 2)	Physical Fitness Test Ranking ( Phase 2)		Average score of two physical fitness tests	Average ranking of two physical fitness tests		Competition ranking (1st leg)	Competition ranking (2nd leg)	Competition ranking (3rd leg)	Competition ranking (4th leg)	Point	Overall competition results
1	20	14	20	18	14	86	40		20	20	20	18	18	96	14		91	35
2	20	20	20	18	7	85	43		20	20	20	20	9	89	35		87	41		5	5	5	3	64.8	6
3	20	20	20	14	20	94	25		20	20	20	17	20	97	10		95.5	19
4	20	20	20	15	9	84	44		20	20	20	16	10	86	40		85	43			5		5
5	20	20	20	17	16	93	28		20	20	20	17	15	92	30		92.5	31
6									20	20	20	11	17	88	39		88	40
7	20	20	20	17	9	86	41										86	42
8	20	20	20	14	20	94	26		20	20	20	14	20	94	21		94	25		5		3		72.72	5
9	20	20	20	16	11	87	39		20	20	20	18	14	92	29		89.5	38			5		5
10	20	20	20	17	20	97	9		20	20	20	20	20	100	2		98.5	2		3				61.7	7
11	20	20	20	20	20	100	2		20	20	20	16	20	96	18		98	7
12									20	20	20	10	19	89	36		89	39
13	20	20	20	13	5	78	46		20	20	20	13	0	73	48		75.5	53
14	20	20	20	14	20	94	27										94	24
15	20	20	20	19	20	99	3		20	20	20	18	20	98	4		98.5	3
16	20	20	20	14	14	88	37		20	20	20	16	6	82	41		85	44
17	20	19	20	16	19	94	21		20	20	20	18	20	98	6		96	16			3		3	61.7	7
18									20	20	20	20	18	98	5		98	5
19	20	20	20	17	20	97	10		20	20	20	16	20	96	16		96.5	11				3
20									20	20	20	17	20	97	12		97	9
21	20	20	20	18	19	97	11		20	20	20	14	19	93	27		95	20
22	20	20	20	14	20	94	22										94	26
23	20	20	20	11	19	90	36		20	20	20	11	6	77	47		83.5	47		5
24	20	20	20	17	0	77	47		20	20	20	16	16	92	32		84.5	45
25	20	20	20	10	20	90	35		20	20	20	11	18	89	37		89.5	37				5
26	20	20	20	15	20	95	19		20	20	20	16	20	96	19		95.5	18
27	20	20	20	12	20	92	31		20	20	20	13	20	93	26		92.5	30
28	20	20	20	16	12	88	38		20	20	20	17	4	81	44		84.5	46			1	5		136.72	2
29	20	20	20	17	18	95	15		20	20	20	16	17	93	24		94	25		3
30	20	10	20	14	9	73	48		20	20	20	14	17	91	34		82	49
31	20	20	20	16	20	96	13		20	20	20	17	20	97	9		96.5	13
32	20	20	20	15	18	93	29		20	20	20	17	11	88	38		90.5	36
33	20	20	20	13	7	80	45		20	20	20	13	8	81	43		80.5	51				5	5
34	20	20	20	20	19	99	5		20	20	20	15	19	94	23		96.5	12
35	20	20	20	15	20	95	17		20	20	20	14	18	92	31		93.5	27
36	20	20	20	14	18	92	32										92	32
37	20	20	20	20	20	100	1		20	20	20	18	20	98	3		99	1			3	2		106.58	3
38	20	20	20	13	18	91	33		20	20	20	13	19	92	28		91.5	34
39	20	20	20	19	20	99	4		20	20	20	17	19	96	15		97.5	8		2				90.24	4
40	20	20	20	18	20	98	8		20	20	20	18	18	96	17		97	10
41	20	20	20	13	18	91	34		20	20	20	13	20	93	25		92	33
42	20	20	20	15	19	94	23		20	20	20	18	18	96	13		95	21
43									20	20	20	11	6	77	46		77	52
44	20	20	20	16	18	94	24		20	20	20	16	19	95	20		94.5	23		5
45	20	20	20	16	20	96	12		20	20	20	17	20	97	11		96.5	14
46	20	20	20	20	15	95	16		20	20	20	20	11	91	33		93	29
47	20	20	20	18	20	98	6		20	20	20	18	20	98	7		98	6
48	20	20	20	18	20	98	7		20	20	20	17	17	94	22		96	17
49	20	20	20	16	17	93	30										93	28
50	20	20	20	15	11	86	42		20	20	20	16	4	80	45		83	48			5		2
51									20	20	20	13	9	82	42		82	50
52	20	20	20	15	20	95	18										95	22
53	20	20	20	15	20	95	20		20	20	20	18	20	98	8		96.5	15					5
54	20	20	20	16	20	96	14		20	20	20	20	20	100	1		98	4		1	2	1	1	260	1

## Sheet: Male 58kg
Athlete serial number	Weighted Squat Score (Phase 1)	Abdominal Muscle Endurance Score (Phase 1)	Back Muscle Endurance Score (Phase 1)	30-meter Run Score (Phase 1)	3000-meter Run Score (Phase 1)	Total Physical Fitness Test Score ( Phase 1)	Physical Fitness Test Ranking ( Phase 1)		Weighted Squat Score (Phase 2)	Abdominal Muscle Endurance Score (Phase 2)	Back Muscle Endurance Score (Phase 2)	30-meter Run Score (Phase 2)	3000-meter Run Score (Phase 2)	Total Physical Fitness Test Score ( Phase 2)	Physical Fitness Test Ranking ( Phase 2)		Average score of two physical fitness tests	Average ranking of two physical fitness tests		Competition ranking (1st leg)	Competition ranking (2nd leg)	Competition ranking (3rd leg)	Competition ranking (4th leg)	Point	Overall competition results
1	20	20	20	14	20	94	26		20	20	20	13	20	93	24		93.5	24
2	20	6	20	17	19	82	51		20	20	20	17	20	97	8		89.5	44			5		5
3	20	7	20	10	4	61	59		20	5	20	10	5	60	47		60.5	62
4	20	20	20	15	7	82	49		20	20	20	14	10	84	43		83	53
5	20	20	20	19	20	99	1		20	20	20	17	20	97	7		98	1			2			85.7	6
6	20	20	20	13	20	93	31										93	27
7									20	20	20	18	15	93	23		93	28
8	20	20	20	17	20	97	8		20	20	20	17	20	97	5		97	3
9	20	20	20	15	20	95	15		20	20	20	14	20	94	18		94.5	20		3	3	5	3	93.6	4
10	20	20	20	13	20	93	32										93	29
11	20	20	20	15	20	95	13		20	20	20	13	20	93	25		94	21
12	20	20	20	20	17	97	6		20	20	20	15	19	94	19		95.5	12
13	20	20	20	18	15	93	30										93	30
14	20	20	20	17	20	97	7		20	20	20	16	20	96	10		96.5	7			1	3	1	146.58	1
15	20	20	20	11	20	91	40										91	39
16	20	20	20	17	20	97	9										97	4
17	20	20	20	19	20	99	2		20	20	20	12	20	92	29		95.5	13
18									20	20	20	12	19	91	32		91	40
19	20	20	20	11	5	76	54										76	59
20	20	20	20	12	20	92	35		20	20	20	13	20	93	22		92.5	33					5
21	20	20	20	13	19	92	36		20	20	20	13	14	87	37		89.5	45			5
22	20	20	20	15	19	94	28		20	20	20	12	20	92	26		93	31		5		5
23	20	20	20	16	20	96	12		20	20	20	10	20	90	33		93	32
24	20	20	20	13	17	90	41										90	43
25	20	12	20	17	20	89	43		20	20	20	16	20	96	11		92.5	34
26	20	20	20	15	20	95	14		20	20	20	12	20	92	28		93.5	25				5
27	20	20	20	17	20	97	5		20	20	20	18	20	98	4		97.5	2
28	20	20	20	14	18	92	37		20	20	20	13	19	92	30		92	35		5
29	20	20	20	14	20	94	27		20	20	20	14	20	94	20		94	22
30	20	20	20	14	20	94	29		20	20	20	19	20	99	2		96.5	8		5	5	1		143.2	2
31	20	20	20	12	19	91	39										91	41
32	20	20	20	13	15	88	45										88	47
33	20	20	20	16	19	95	18		20	20	20	17	19	96	14		95.5	14		3			5	61.7	6
34	20	20	20	15	20	95	16		20	20	20	15	20	95	15		95	16
35	20	20	20	18	18	96	10										96	9
36	20	20	20	11	11	82	52										82	55
37	20	20	20	15	20	95	19		20	20	20	15	20	95	16		95	17
38	20	20	20	16	18	94	22		20	20	20	17	12	89	35		91.5	38
39	20	20	20	15	19	94	23		20	20	20	20	18	98	3		96	10				3	5
40	20	6	20	16	20	82	50		20	20	20	15	20	95	17		88.5	46
41	20	8	20	14	9	71	56		20	20	20	17	8	85	40		78	58
42	20	20	20	19	15	94	24		20	20	20	17	19	96	12		95	18
43	20	20	20	13	16	89	42		20	20	20	9	17	86	38		87.5	48
44	20	20	20	15	20	95	20		20	20	20	13	20	93	21		94	23
45	20	20	20	13	20	93	33		20	20	20	11	20	91	31		92	36
46									20	20	20	11	9	80	45		80	56
47	20	20	20	17	20	97	4		20	20	20	17	20	97	6		97	5		1			2	121.16	3
48	20	20	20	15	20	95	17		20	20	20	12	20	92	27		93.5	26			3		3
49	20	18	20	19	14	91	38										91	42
50	20	20	20	17	10	87	48		20	20	20	13	7	80	44		83.5	52
51	20	20	20	10	17	87	47										87	49
52	20	16	20	13	19	88	46		20	20	20	11	15	86	39		87	50				5
53	10	20	20	9	14	73	55										73	60
54	20	4	20	19	8	71	57		20	20	20	18	9	87	36		79	57
55	20	20	20	20	12	92	34		20	20	20	19	20	99	1		95.5	15		5		2		92.18	5
56	20	20	20	19	9	88	44		20	20	20	17	7	84	42		86	51			5
57	20	20	20	16	5	81	53		20	20	20	12	13	85	41		83	54
58	20	20	20	18	20	98	3		20	20	20	16	20	96	9		97	6		2				85.7	6
59	20	20	20	16	20	96	11		20	20	20	16	20	96	13		96	11
60	20	20	20	15	20	95	21										95	19
61	20	5	20	12	8	65	58		20	20	20	10	9	79	46		72	61
62	20	20	20	15	19	94	25		20	20	20	18	12	90	34		92	37

[truncated: 6 more sheets: Male 63kg, Male 68kg, Male 74kg, Male 80kg, Male 87kg, Male +87kg]
